# Supplementary material
Source: PubMed Central journal article supplement (PMC556248)

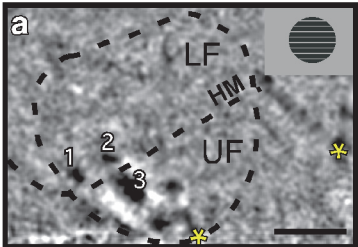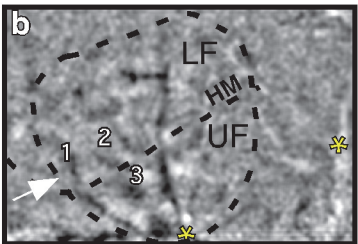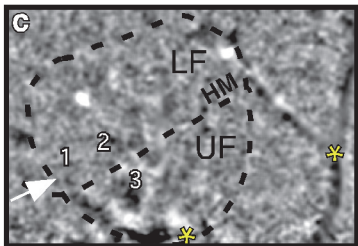

Supplement: pnas_102_15_5594__1.pdf [file pnas_102_15_5594__1.pdf]

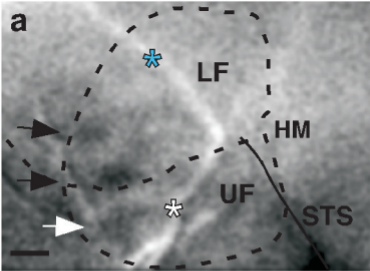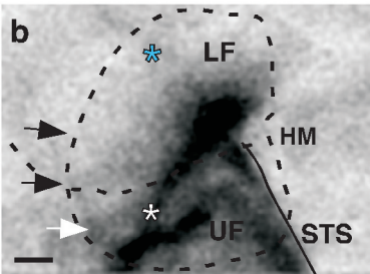

Supplement: pnas_102_15_5594__2.pdf [file pnas_102_15_5594__2.pdf]

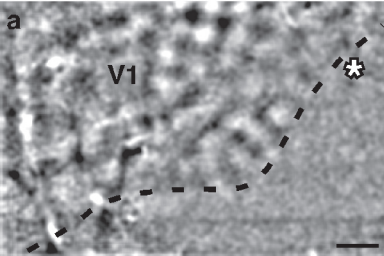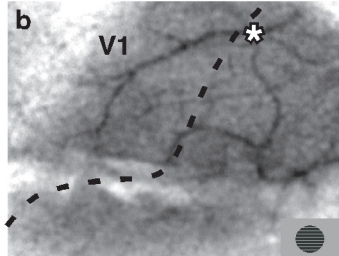

Supplement: pnas_102_15_5594__3.pdf [file pnas_102_15_5594__3.pdf]
